# Supplementary material for: Pan-genome diversification and recombination in Cronobacter sakazakii, an opportunistic pathogen in neonates, and insights to its xerotolerant lifestyle
Source: PubMed Central journal article supplement (PMC6935241; doi:10.1186/s12866-019-1664-7), 2019-12-27

**a**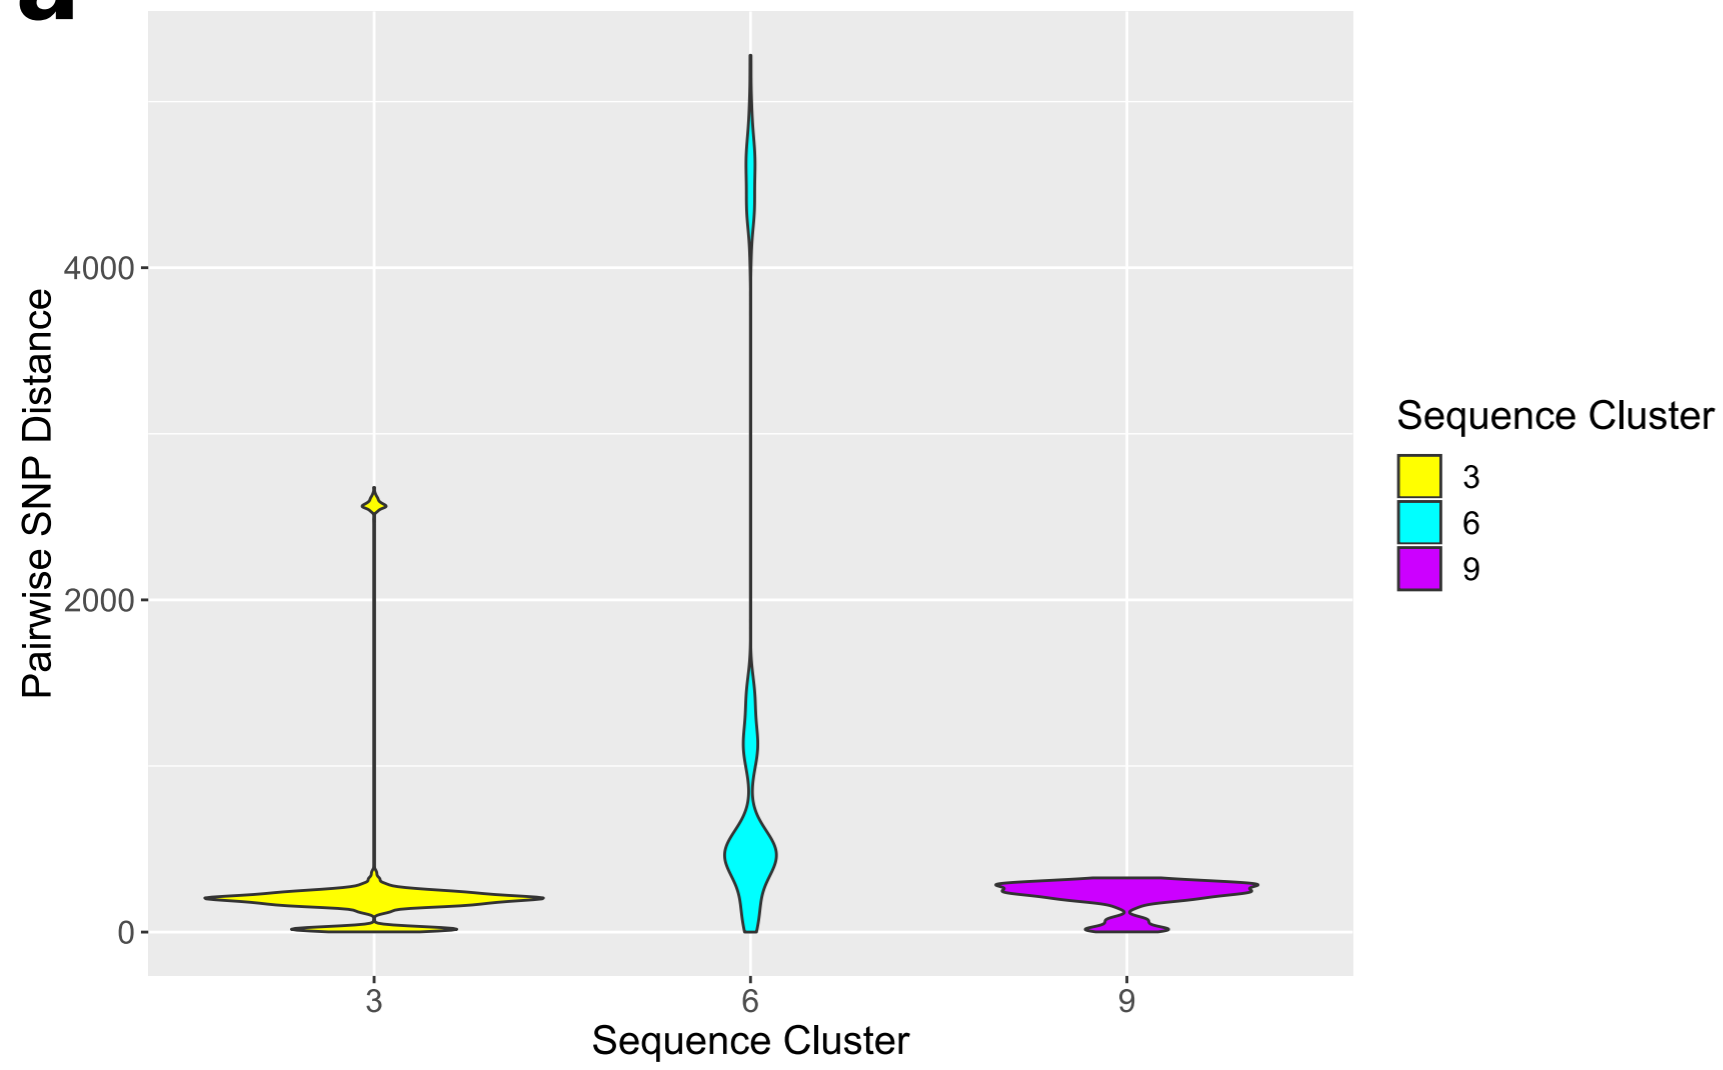**b**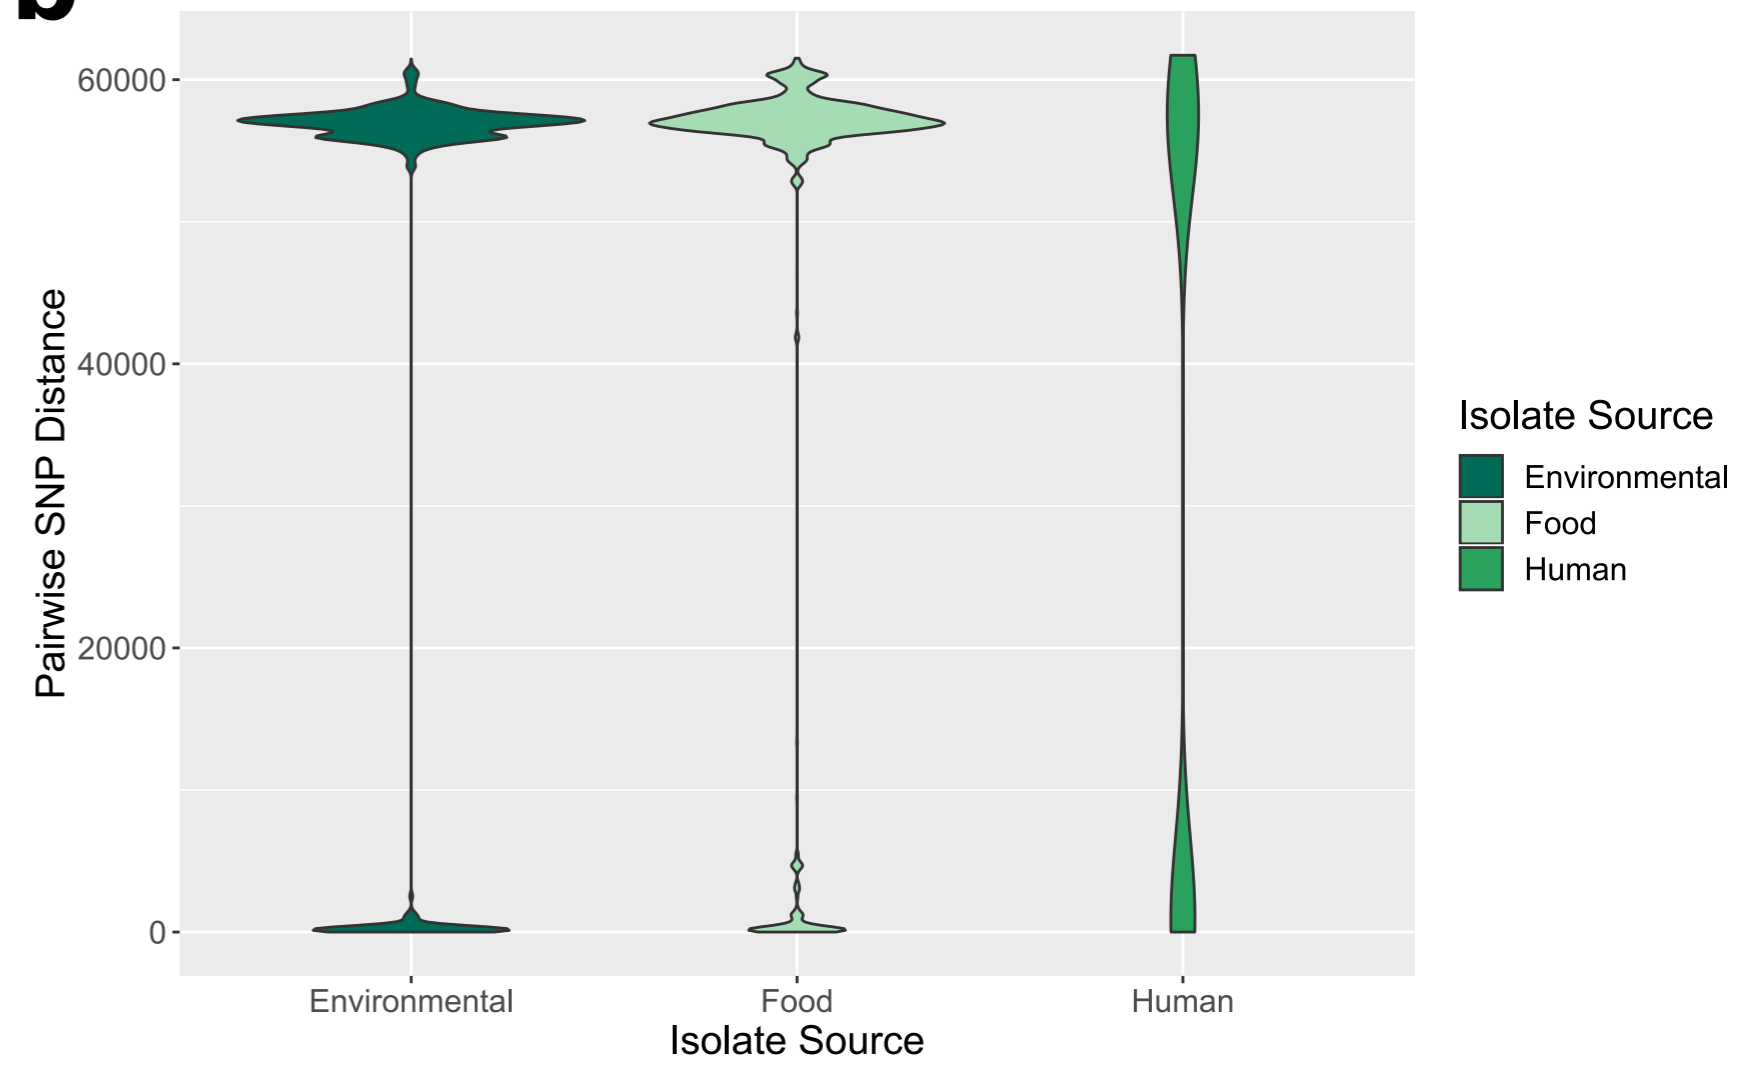**c**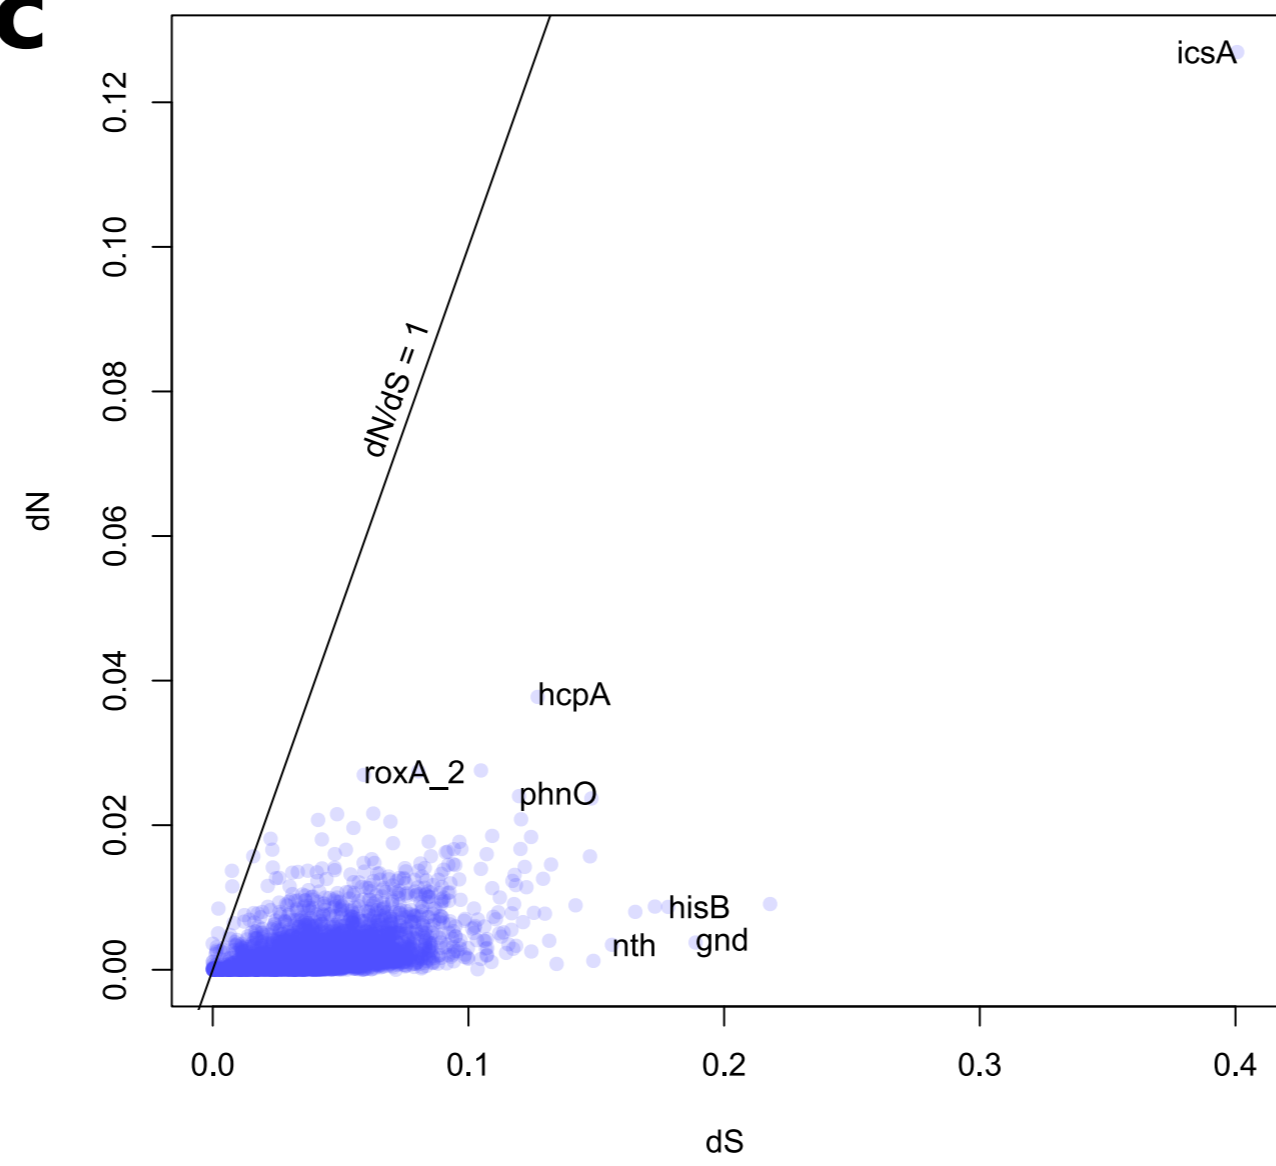

Supplement: 12866_2019_1664_MOESM1_ESM.pdf [file 12866_2019_1664_MOESM1_ESM.pdf]
